# Supplementary material for: An Integrative Systems Biology Approach Identifies Molecular Signatures Associated with Gallbladder Cancer Pathogenesis
Source: MDPI journal article supplement (doi:10.3390/jcm10163520), 2021-08-10
Supplement: s1 [file s1]

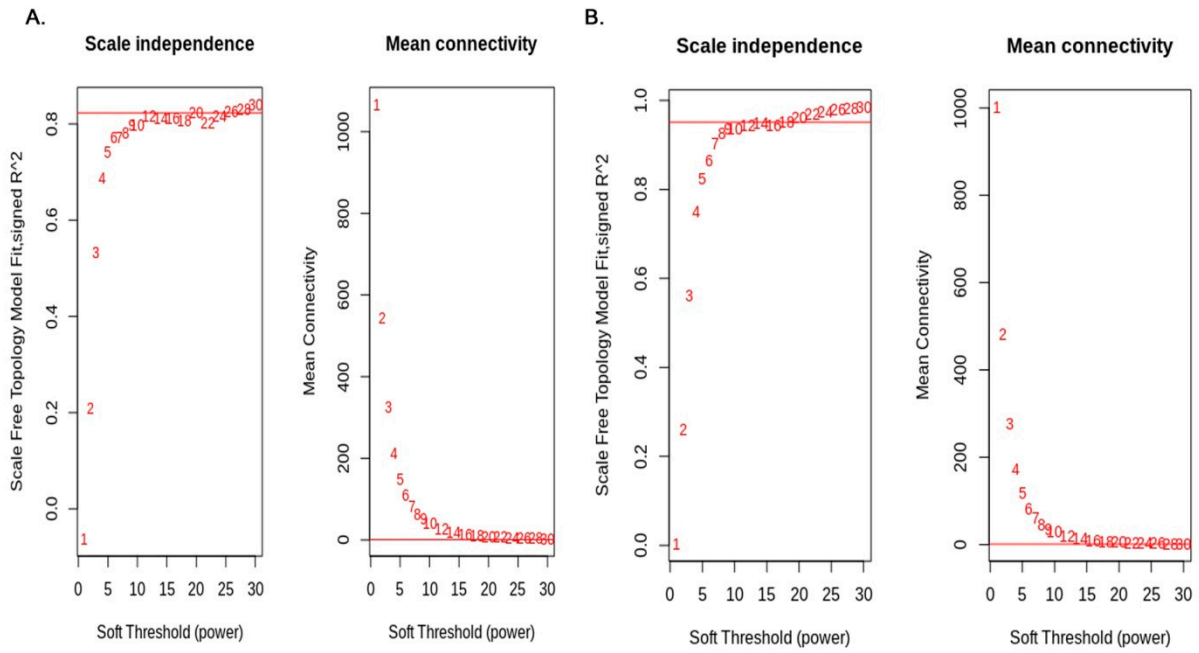

**Figure S1.**  $\beta$  power value for GBC and control network generated through gene co-expression network construction respectively.

**Table S1.** *Z-summary* preservation of modules in GBC network.

| Module        | <i>medianRank.pres</i> | <i>Z-summary.pres</i> |
|---------------|------------------------|-----------------------|
| black         | 16                     | 2.2                   |
| brown         | 4                      | 27                    |
| cyan          | 10                     | 4.1                   |
| darkgreen     | 2                      | 6.4                   |
| darkgrey      | 10                     | 2.6                   |
| darkorange    | 7                      | 2.6                   |
| darkred       | 5                      | 5.3                   |
| darkturquoise | 13                     | 2.5                   |
| green         | 17                     | 2.1                   |
| greenyellow   | 8                      | 4.9                   |
| grey60        | 19                     | 0.86                  |
| lightgreen    | 3                      | 6.4                   |
| lightyellow   | 13                     | 3.5                   |
| magenta       | 16                     | 3                     |
| midnightblue  | 10                     | 3.8                   |
| purple        | 1                      | 19                    |
| royalblue     | 8                      | 3.7                   |
| salmon        | 20                     | 1.4                   |
| tan           | 18                     | 1.1                   |
| white         | 12                     | 2.7                   |

**Table S2.** *Z-summary* preservation of modules in control network.

| Modules   | <i>medianRank.pres</i> | <i>Z-summary.pres</i> |
|-----------|------------------------|-----------------------|
| blue      | 3                      | 29                    |
| cyan      | 11                     | 4.2                   |
| darkgreen | 9                      | 2.8                   |

|               |    |      |
|---------------|----|------|
| darkgrey      | 4  | 3.6  |
| darkorange    | 12 | 3.7  |
| darkred       | 13 | 2.2  |
| darkturquoise | 6  | 4.1  |
| green         | 1  | 12   |
| greenyellow   | 12 | 3.6  |
| lightcyan     | 16 | 6.3  |
| lightyellow   | 13 | 2.3  |
| midnightblue  | 16 | 0.91 |
| orange        | 5  | 3.2  |
| pink          | 13 | 3.5  |
| red           | 14 | 5.1  |
| royalblue     | 16 | 1.2  |
| tan           | 16 | 2.3  |
| turquoise     | 3  | 15   |

**Table S3.** Pairwise correlation analysis of each sample using three EMT scoring metrics- KS, MLR and 76GS (negative strong correlation between 76GS and KS or MLR, positive strong correlation between MLR and KS).

| Sample_name | 76Gs              | MLR         | KS           |
|-------------|-------------------|-------------|--------------|
| GSM4146148  | 6.92582495614312  | 0.922485283 | -0.419032672 |
| GSM4146149  | -15.4277105379992 | 1.038697965 | 0.272364103  |
| GSM4146150  | -2.78710068072522 | 0.956055384 | -0.085746897 |
| GSM4146151  | 3.08850458758825  | 0.939545828 | -0.253673848 |
| GSM4146152  | 3.54856723716013  | 0.940623403 | -0.276644314 |
| GSM4146153  | -11.2641449810022 | 0.962427526 | 0.121129976  |
| GSM4146154  | 7.92566592889314  | 0.931538294 | -0.382222856 |
| GSM4146155  | 4.85039097543316  | 0.924028816 | -0.223997717 |
| GSM4146156  | 5.34065727847344  | 0.920960796 | -0.30960194  |
| GSM4146157  | 5.83634613093576  | 0.935251049 | -0.229847339 |
| GSM4146158  | 11.6216471377933  | 0.887363848 | -0.330860322 |
| GSM4146159  | -19.0938301382121 | 1.06273886  | 0.357968326  |
| GSM4146160  | 12.4611940094735  | 0.932319314 | -0.486517335 |
| GSM4146161  | 6.64607743670175  | 0.942107475 | -0.256955343 |
| GSM4146162  | 11.4271108425853  | 0.903626614 | -0.482950492 |
| GSM4146163  | -18.4380535030102 | 1.046387984 | 0.277928378  |
| GSM4146164  | 11.1470869283106  | 0.903418062 | -0.58952775  |
| GSM4146165  | 3.95593866468601  | 0.925905771 | -0.212726495 |
| GSM4146166  | -9.47737699957706 | 1.038349726 | 0.130831788  |
| GSM4146167  | -18.2867952736515 | 1.038623957 | 0.247253531  |
